# Supplementary material for: Correlation between preoperative uric acid levels and lymph node metastases in patients with papillary thyroid cancer: a retrospective study
Source: PeerJ. 2025 Jul 10;13:e19410. doi: 10.7717/peerj.19410 (PMC12256038; doi:10.7717/peerj.19410)
Supplement: Supplemental Information 1 [file peerj-13-19410-s001.xlsx]

## Sheet: Sheet1
CLNM	sex	UA	TG	LDL-C	BMI	Cr	Glu	FT3	FT4	TSH	braf	age	Tumorsize	CLNMnumber	Facility	Capsularinvasion	HT	location	Margin	Shape	Echo	Miccal
1	1	686	1.19	2.07	25.12	115	5.21	2.35	10.94	3.146	1	0	0	2	1	0	0	1	1	1	0	1
1	1	605	3.88	2.95	25.13	166	6.02	4.57	13.79	0.654	1	0	0	2	0	0	0	1	1	1	0	1
0	1	595	0.98	1.95	25.43	149	4.73	4.93	12.19	0.772	1	0	0	0	0	0	1	2	1	1	0	1
1	1	585	1.79	2.41	26.78	188	5.43	4.73	10.71	1.107	1	0	0	1	0	0	0	1	1	1	0	1
0	0	579	1.77	4.39	28.12	144	4.87	3.77	11.36	3.254	1	0	0	0	0	0	1	1	0	0	0	1
1	1	569	1.95	4.44	28.35	139	4.79	3.81	14.42	1.133	1	0	0	3	0	0	1	1	1	1	0	0
1	1	561	1.97	4.40	28.12	137	5.45	5.33	11.62	0.842	1	0	1	4	1	0	1	1	0	0	0	1
0	1	554	3.88	3.26	27.67	189	4.11	4.06	13.49	1.181	1	0	0	0	1	0	0	1	1	1	0	1
1	1	553	3.91	3.28	27.53	110	4.11	4.06	13.49	1.181	1	0	0	2	0	0	0	2	0	1	0	1
0	1	552	4.12	3.24	27.31	124	4.75	4.18	14.38	1.434	0	0	0	0	0	0	0	1	0	1	0	1
1	0	548	1.07	4.56	27.32	163	5.61	4.22	15.01	3.475	1	0	0	1	0	1	0	1	1	1	0	1
1	0	542	4.20	2.52	27.12	127	5.17	4.29	12.50	1.084	0	1	0	2	0	0	0	1	0	1	0	0
1	0	522	4.30	3.12	26.43	165	6.11	5.18	15.24	3.612	1	1	1	2	0	0	1	1	0	0	0	1
1	0	521	4.60	3.14	26.89	111	6.36	4.38	12.21	2.142	1	0	1	3	0	1	0	0	0	1	0	1
1	0	525	2.30	3.09	26.54	99	6.36	4.85	14.53	1.299	1	0	0	3	0	0	1	1	1	1	0	1
1	0	520	4.33	3.11	25.12	98	6.36	5.07	14.13	1.79	1	0	0	1	0	0	0	0	0	1	0	0
1	0	517	1.5	2.2	26.58	132	5.43	4.85	14.53	1.299	1	0	0	1	0	0	1	1	1	1	0	1
1	1	516	1.53	4.20	23.12	120	5.21	5.07	14.13	1.79	1	0	0	1	0	0	0	0	0	1	0	0
1	1	515	3.54	2.02	23.56	152	5.30	4.14	14.11	0.585	1	0	0	2	0	0	1	1	1	1	0	0
0	0	506	4.10	3.02	23.67	194	5.43	4.60	12.31	1.488	1	0	1	0	0	0	1	0	0	0	0	1
1	0	505	1.85	4	24.12	191	4.72	4.22	10.81	1.307	1	0	0	1	0	0	0	2	1	1	0	0
0	0	502	3.85	4.23	24.32	185	6.49	5.04	12.38	1.466	0	0	1	0	0	0	1	2	1	1	0	1
1	1	501	1.87	4.02	24.67	164	5.59	4.97	12.79	1.639	1	0	1	7	1	0	0	1	1	1	1	1
0	1	500	2.98	4.12	24.12	136	5.41	4.04	10.91	1.748	1	1	0	0	0	0	1	2	0	1	0	1
1	1	500	1.32	1.98	25.45	168	4.83	4.65	13.12	2.274	1	0	0	1	0	0	1	0	1	1	0	0
0	0	499	3.34	1.99	26.12	185	6.51	4.80	13.31	1.783	0	0	0	0	0	1	0	1	1	1	1	1
1	0	497	1.34	1.94	26.13	160	6.51	4.45	14.58	1.202	1	0	0	3	1	0	0	1	1	1	0	0
1	0	492	1.59	2.91	27.23	177	6.67	4.45	14.58	1.202	1	0	0	3	1	0	0	1	1	1	0	0
1	1	491	2.59	3.93	27.43	143	4.95	5.02	13.40	1.748	1	0	1	6	0	0	1	1	1	1	0	1
0	0	487	0.73	2.32	26.21	172	5.01	4.08	12.32	1.753	1	0	0	0	0	0	0	1	1	1	0	1
1	1	485	4.72	2.33	25.12	100	4.73	4.20	12.80	1.395	1	0	0	1	0	0	0	1	0	1	0	1
0	0	482	0.71	2.28	26.21	198	5.01	4.08	13.40	1.748	1	0	1	0	0	0	1	1	1	1	0	1
1	1	474	4.07	4.03	25.32	170	5.95	4.38	13.53	1.172	1	1	0	2	1	0	1	1	0	1	0	0
1	0	468	4.05	4.04	25.09	151	8.05	4.60	14.35	2.400	0	0	0	3	0	0	1	1	1	0	0	1
1	0	466	4.03	4.00	25.07	143	4.75	4.18	14.38	1.434	0	0	0	2	0	0	0	2	0	1	0	1
1	1	465	1.26	3.53	25.02	198	4.82	4.42	15.81	1.854	1	0	0	1	0	0	1	3	1	1	0	1
0	1	463	1.29	2.53	25.02	179	4.82	4.42	15.81	1.172	1	1	0	0	1	0	1	1	0	1	0	0
1	1	461	3.26	2.55	25.23	156	5.13	5.14	12.53	1.283	1	0	0	4	1	0	1	1	1	1	0	1
1	1	460	1.24	2.49	25.24	192	5.13	5.14	12.53	1.283	0	0	0	4	0	0	1	1	1	0	0	1
0	1	459	1.82	3.02	25.56	154	5.60	4.62	12.57	0.827	1	0	0	0	1	1	1	1	1	1	0	1
0	1	458	1.84	3.01	25.56	196	5.60	5.14	12.53	1.283	1	0	0	0	1	0	1	1	1	1	0	1
0	1	457	1.79	1.02	25.56	165	5.60	4.62	15.16	0.818	0	1	1	0	1	0	0	1	1	1	0	1
1	1	450	1.84	3.05	25.32	180	5.65	4.31	14.06	2.470	1	0	1	2	0	0	0	1	1	1	0	1
0	1	449	2.51	3.51	24.87	110	4.64	4.21	12.42	0.992	1	0	0	0	0	0	0	1	1	1	0	0
1	1	448	2.49	3.53	24.97	132	5.38	5.46	13.85	1.839	1	0	0	2	1	0	1	3	1	1	0	1
1	1	446	2.42	3.63	26.19	197	5.24	4.64	14.34	2.028	1	0	0	7	1	0	1	0	1	0	0	1
0	1	445	4.24	3.61	26.12	126	8.46	4.04	12.07	1.990	1	1	0	0	0	0	0	1	1	1	0	0
1	1	439	1.71	3.97	23.12	192	8.71	4.22	12.42	1.029	1	0	1	7	0	0	0	2	0	1	0	1
1	1	435	1.73	1.87	23.14	191	5.12	4.91	14.96	1.618	0	0	0	6	1	0	0	1	1	0	1	0
1	1	434	2.32	2.86	23.67	183	5.13	4.22	10.99	2.104	1	0	0	1	0	1	0	0	1	1	0	1
1	0	433	1.32	3.86	23.67	121	5.07	4.18	13.52	2.266	1	0	0	2	0	0	0	0	1	1	0	0
1	1	432	1.36	2.1	23.46	112	7.35	3.67	12.29	1.048	1	1	0	1	0	0	0	0	0	1	0	0
0	0	430	1.34	2.24	22.56	179	4.90	4.35	14.05	1.861	1	0	0	0	0	1	0	1	0	0	0	1
1	1	429	2.65	2.69	22.78	131	5.91	4.83	12.39	2.540	1	0	0	2	0	1	0	0	0	0	0	0
1	1	428	2.63	3.79	22.59	140	5.36	4.89	13.22	1.449	1	0	0	2	1	0	0	1	1	1	0	1
1	0	428	1.01	3.19	23.45	104	4.9	4.16	13.41	1.205	0	0	0	7	0	0	0	0	0	1	0	1
0	1	427	3.01	2.17	22.12	159	5.16	6.34	16.97	0.002	1	1	1	0	1	0	1	1	1	0	0	1
0	0	421	0.59	3.08	25.12	151	5.14	5.40	13.60	1.397	1	0	0	0	0	0	0	0	1	1	0	0
1	0	420	0.54	4.08	25.14	101	5.23	3.98	15.23	0.417	1	0	0	4	1	0	0	1	1	1	0	0
1	0	419	0.62	2.17	25.12	67	5.49	4.29	12.22	1.479	1	0	0	2	0	0	1	3	1	0	0	0
1	1	418	0.66	3.19	25.68	65	5.89	4.16	12.75	1.271	1	0	1	1	0	0	0	1	1	1	0	1
1	1	418	4.51	3.34	24.78	89	5.12	4.41	14.53	3.15	1	0	0	7	0	1	0	1	1	1	0	0
1	0	417	5.53	3.36	24.67	56	5.16	5.11	13.95	1.841	0	0	1	4	0	0	0	1	0	1	0	0
1	0	416	1.02	3.1	24.27	84	5.29	4.61	12.38	0.637	1	0	0	3	0	0	0	1	0	0	0	0
1	1	408	3.02	3.12	24.12	90	6.51	3.48	13.11	3.040	1	1	0	2	0	1	0	3	0	0	0	1
0	0	406	3.00	3.56	26.12	52	5.03	4.53	12.83	1.701	1	0	0	0	0	1	0	1	1	1	0	0
1	1	407	2.98	3.59	27.45	80	5.45	4.53	13.65	0.478	1	0	0	3	1	0	0	1	0	1	0	1
0	0	405	0.89	3.65	28.12	71	4.94	4.87	16.21	1.738	1	0	0	0	0	0	1	2	0	0	0	1
1	1	403	0.91	1.64	28.10	99	5.38	5.42	13.81	0.625	1	0	1	7	0	0	1	1	0	1	0	1
0	0	401	2.53	2.08	28.32	55	4.90	3.25	12.20	1.295	0	0	0	0	0	0	1	2	1	1	0	0
0	1	400	1.52	2.08	27.12	95	5.36	4.78	9.11	6.099	0	0	0	0	1	0	1	2	0	0	0	0
1	1	399	1.36	2.44	27.35	79	5.70	4.04	9.11	3.243	1	0	0	1	0	0	0	1	0	0	0	1
0	1	397	1.37	4.44	27.89	77	4.01	4.62	14.78	1.493	1	0	1	0	1	0	1	0	1	1	0	0
1	1	396	2.76	2.50	27.34	73	5.48	5.42	12.84	3.332	1	0	1	17	1	0	0	3	1	1	0	1
1	1	395	2.77	2.53	27.31	66	4.94	4.74	10.55	2.499	0	1	0	1	0	0	0	1	1	1	0	0
0	1	394	4.54	2.02	27.12	67	5.23	4.91	12.85	1.731	1	1	0	0	0	0	0	0	1	0	0	1
1	0	393	3.55	2.01	27.45	68	4.78	16.89	33.62	0.002	1	0	0	1	0	1	1	1	1	1	0	0
0	1	391	1.58	3.59	26.67	66	5.36	3.37	11.92	2.971	1	0	0	0	1	0	1	1	1	1	0	0
1	1	390	1.61	3.57	26.78	71	5.03	4.18	15.33	0.468	1	0	0	1	0	0	0	0	1	1	0	1
1	0	390	1.05	2.46	26.67	65	5.03	4.18	15.33	0.468	1	0	0	1	0	0	1	0	1	1	0	1
1	0	389	1.01	3.56	26.54	84	4.57	4.04	14.46	1.512	1	0	0	1	0	0	0	2	1	1	0	1
0	0	388	4.45	4.35	26.35	62	5.55	4.35	12.95	1.2	1	0	0	0	1	0	1	1	0	1	0	1
1	1	387	4.47	4.37	26.34	85	5.50	4.99	16.10	0.192	1	0	0	6	0	0	0	1	0	1	0	0
1	1	386	0.9	3.19	26.19	54	4.96	4.91	13.03	0.600	1	1	0	4	0	1	0	2	1	1	0	0
1	0	386.20	2.90	3.16	25.43	74	4.55	4.05	10.60	5.310	1	0	0	9	1	0	1	1	1	1	0	1
1	1	384	2.14	2.73	25.19	89	6.10	3.97	12.04	2.932	0	1	0	2	0	0	1	1	0	1	1	0
0	1	383	2.11	2.75	25.78	51	5.86	4.16	12.76	0.653	0	1	0	0	0	0	1	1	1	0	0	1
0	0	382	0.9	3.28	25.18	61	5.27	3.66	13.38	0.871	1	0	0	0	0	0	1	0	1	1	0	1
1	0	381	0.93	3.31	25.34	57	5.4	3.18	10.06	1.021	1	0	0	1	0	1	0	2	1	1	0	1
0	0	380	1.05	2.15	25.12	57	5.55	4.42	13.44	1.73	1	1	0	0	0	0	1	2	0	1	0	0
1	1	379	1.07	2.17	24.12	98	5.30	4.65	11.80	0.955	1	0	0	2	0	0	0	1	1	1	0	0
0	1	378	3.58	3.48	25.19	78	5.53	4.85	13.50	2.283	0	0	0	0	0	0	0	0	1	1	0	0
1	0	376	1.58	3.51	25.45	82	5.48	3.52	13.82	3.028	0	0	0	1	0	0	1	2	1	0	1	1
1	1	375	0.98	3.40	26.12	96	5.30	4.05	12.44	0.555	1	0	1	11	0	0	1	2	1	1	0	1
1	1	374	0.99	3.43	28.00	75	5.68	4.28	12.14	1.129	1	0	0	10	0	0	1	2	1	1	0	1
1	1	374	1.39	2.82	27.12	69	4.84	4.03	12.43	0.542	1	0	0	4	1	0	0	1	0	0	0	1
0	1	373	1.41	2.81	27.45	85	4.95	4.20	11.16	2.555	1	0	0	0	0	0	1	1	1	0	0	0
1	1	372	0.85	1.98	27.13	71	5.89	4.51	13.66	1.568	0	0	0	1	0	1	0	1	1	1	0	0
0	1	369	0.83	2.97	26.12	88	7.06	4.34	10.58	4.726	1	1	1	0	1	0	1	3	1	1	0	0
1	1	368	2.76	2.92	26.45	57	5.11	4.64	13.44	2.236	1	1	0	5	0	0	1	0	0	1	0	1
1	0	365	1.7	2.93	26.12	100	5.37	3.05	10.08	4.803	1	0	1	11	0	0	0	2	0	0	1	1
1	1	364	0.42	3.01	24.12	89	5.01	4.56	14.96	1.965	1	0	0	6	0	0	0	2	1	1	0	1
0	1	364	0.45	2.00	24.21	67	5.41	4.53	13.08	4.737	1	0	1	0	0	0	0	1	0	1	0	0
1	0	363	1.99	4.01	24.45	65	5.83	4.25	10.66	2.661	1	1	0	6	0	1	1	1	1	1	0	0
1	0	362	1.96	4.03	24.12	100	5.04	4.28	12.22	1.079	1	0	0	4	0	0	0	1	0	1	0	0
1	0	361	1.89	1.70	23.12	65	4.42	4.19	17.39	0.09	1	0	0	6	0	0	0	1	1	1	0	0
0	0	360	1.92	1.68	23.56	90	5.28	5.50	12.64	1.521	1	1	0	0	1	0	0	2	1	1	0	1
1	1	359	2.57	3.11	23.45	50	4.53	4.11	10.49	1.188	1	0	0	2	1	0	0	3	1	0	0	1
0	0	358	0.58	3.13	23.12	73	4.52	4.43	13.61	0.901	1	1	0	0	1	0	0	3	1	0	0	1
1	0	356	1.04	3.14	23.45	68	4.54	4.56	13.38	0.451	1	0	1	8	0	0	0	1	1	1	0	0
1	0	355	1.01	3.17	22.12	70	5.39	4.30	10.52	2.003	1	0	0	2	0	0	0	1	1	1	0	0
0	1	357	1.03	3.65	23.12	79	4.63	4.79	15.06	1.644	1	0	0	0	0	0	0	1	0	0	0	1
0	1	352	1.07	2.61	24.18	60	5.39	6.21	13.68	1.871	1	1	0	0	0	0	1	1	1	1	0	0
1	1	351	0.95	2.34	24.89	93	5.75	4.32	15.52	1.145	1	0	0	1	0	0	1	0	1	1	0	0
1	1	352	0.91	2.33	25.12	81	5.11	5.16	11.35	4.455	0	0	0	1	0	0	1	1	1	0	0	1
1	1	351	1.13	4.16	25.19	82	5.02	4.59	11.91	1.266	1	0	0	6	0	0	0	3	1	1	0	1
0	1	350	1.14	4.19	25.18	97	4.61	3.98	15.26	3.484	1	1	0	0	0	1	1	0	1	1	0	1
0	0	350	1.82	3.90	25.09	70	6.47	4.37	13.31	1.414	1	1	0	0	0	0	1	1	1	1	0	0
1	0	349	1.79	3.89	24.23	68	4.85	3.63	13.72	2.813	1	0	0	2	1	0	1	3	1	1	0	0
1	1	348	1.14	2.02	24.56	89	5.00	4.62	11.52	0.820	0	0	0	1	0	0	0	0	1	1	1	1
0	1	345	1.11	3.03	24.18	73	4.93	4.20	12.64	1.609	0	0	0	0	0	0	1	0	1	1	0	0
1	0	347	2.55	2.15	24.19	69	5.05	4.53	14.57	0.893	1	0	1	18	0	0	1	1	0	0	0	1
1	1	346	2.57	2.17	24.12	91	5.24	4.87	16.63	0.825	1	0	0	2	1	0	1	1	1	1	0	0
0	0	344	0.79	3.21	24.10	80	4.82	4.42	15.30	1.207	1	0	0	0	1	0	1	1	1	1	0	1
1	1	343	0.77	3.23	23.89	54	4.82	4.38	12.65	0.641	1	0	0	3	1	0	1	1	1	1	0	1
1	1	342	0.96	2.35	23.98	55	4.72	5.19	14.24	1.527	1	0	0	1	0	0	1	2	0	1	0	0
0	0	342	0.94	2.37	23.78	90	8.32	3.95	10.48	4.867	1	0	0	0	0	0	0	1	1	1	0	1
1	0	341	1.32	3.29	23.77	53	4.98	4.51	15.94	1.544	1	0	1	1	0	1	1	0	1	1	0	1
0	1	340	1.35	3.28	23.67	53	4.74	3.30	11.83	0.932	1	0	0	0	0	0	0	2	1	1	0	0
1	1	337	1.43	2.43	23.87	65	5.29	4.71	11.05	2.041	1	0	0	3	1	0	0	3	1	1	0	0
1	0	336	1.45	2.41	23.76	52	6.02	3.46	15.16	0.818	0	1	1	2	1	0	0	1	1	1	0	1
1	0	333	2.23	2.54	21.25	81	4.76	3.61	12.34	1.756	0	0	0	1	1	0	0	0	1	1	0	1
0	1	332	1.12	4.65	22.45	100	5.22	5.03	12.33	1.976	0	0	0	0	0	0	0	1	0	1	0	1
0	1	232	1.11	2.54	22.45	87	5.22	4.63	12.87	1.341	1	1	0	0	0	0	1	1	1	1	0	0
0	0	331	1.01	2.41	23.56	59	6.05	4.63	12.87	1.341	1	1	0	0	0	0	1	2	1	1	0	0
1	0	330	1.03	2.43	23.78	84	5.14	7.06	23.16	0.003	0	0	0	1	0	0	0	3	1	0	0	0
0	1	330	1.1	3.25	23.17	62	4.84	4.30	15.23	1.448	1	1	0	0	1	0	0	1	0	1	0	1
1	0	329	1.13	3.23	22.12	63	6.46	3.16	13.32	1.226	0	1	0	1	0	0	1	1	1	1	0	0
1	1	329	0.86	2.36	22.56	55	5.50	4.57	14.23	3.37	1	0	0	1	0	0	0	3	0	1	0	1
1	0	328	1.07	3.24	22.12	52	6.46	3.16	14.23	3.37	1	0	0	1	0	0	0	3	0	1	0	1
1	0	328	0.86	2.36	22.89	81	4.73	4.11	13.07	2.077	1	0	0	3	0	0	1	2	1	1	0	0
0	1	327	1.27	2.37	22.98	84	4.66	4.09	10.64	2.499	1	0	0	0	0	0	0	1	0	0	0	1
1	1	325	1.29	2.39	23.00	62	5.14	5.02	12.40	1.803	1	0	0	6	0	1	0	2	1	1	0	0
0	1	324	3.84	4.88	23.12	67	5.14	4.27	12.13	1.609	1	0	0	0	1	0	0	1	1	1	0	0
1	1	327	1.27	2.36	23.00	62	5.14	4.72	12.70	2.704	0	0	1	6	0	0	0	0	1	1	0	0
0	1	326	3.84	4.89	23.98	56	5.40	4.26	12.30	1.183	1	1	0	0	1	1	1	1	1	1	0	0
0	1	326	1.22	2.86	23.16	74	5.40	4.26	12.30	1.183	1	1	0	0	1	0	1	1	1	0	0	0
1	0	324	1.24	1.84	23.56	94	5.15	4.72	12.70	2.704	0	0	1	3	0	0	0	0	1	1	0	0
0	1	323	1.21	4.30	23.67	97	4.39	4.20	13.54	1.256	0	0	0	0	1	1	0	0	0	0	0	0
1	0	335	1.19	4.33	23.12	65	6.75	4.79	21.31	2.331	1	1	1	8	0	0	1	1	1	1	1	0
1	0	323	2.18	3.19	23.98	79	4.94	4.35	12.73	1.854	0	0	1	7	0	0	0	2	0	1	0	0
1	0	338	2.17	3.17	23.98	52	4.94	4.35	13.72	0.259	1	0	1	16	0	0	1	1	0	1	0	1
1	0	322	2.18	3.16	23.78	61	4.62	4.44	13.72	0.259	1	0	1	16	0	0	1	1	0	1	0	1
1	0	334	1.02	2.07	24.12	96	4.84	3.92	12.91	1.264	1	0	0	1	1	0	1	1	0	1	0	0
1	0	322	1.04	2.11	24.76	98	5.30	3.73	11.88	1.691	1	0	0	6	0	0	0	0	0	0	1	1
1	0	321	0.78	2.55	24.98	84	4.65	4.15	12.23	2.601	1	0	0	1	0	0	1	2	1	1	0	1
0	0	320	0.76	2.57	23.98	84	4.99	4.13	14.10	0.586	1	1	0	0	1	0	0	2	1	1	0	0
0	1	319	1.69	3.60	23.67	90	4.73	4.26	12.99	0.480	1	0	0	0	0	0	0	1	1	1	0	0
0	1	319	1.71	3.56	23.67	90	4.73	4.26	14.10	0.586	1	1	0	0	1	0	0	2	1	1	0	0
1	0	339	1.67	3.59	23.78	75	5.05	3.68	12.07	1.836	1	1	1	3	1	1	0	1	1	0	1	1
0	0	318	1.72	2.13	26.12	87	4.82	4.45	14.81	1.653	1	0	0	0	1	0	1	0	1	1	0	1
0	1	318	1.77	2.11	27.12	74	4.40	3.74	14.55	3.724	1	0	0	0	0	0	1	1	1	1	0	1
1	0	317	1.31	2.87	27.67	61	5.36	4.22	13.77	1.734	0	0	0	1	0	0	0	2	1	0	0	0
1	0	317	1.29	2.85	27.67	66	5.36	4.95	13.67	0.270	1	1	0	2	0	0	0	3	0	1	0	0
0	0	316	1.33	2.81	25.34	62	5.56	4.95	13.67	0.270	1	1	0	0	0	0	0	3	0	1	0	0
1	1	315	1.06	2.49	25.87	59	9.60	4.37	13.08	0.201	1	0	1	5	0	1	1	2	1	1	0	1
1	1	314	1.09	2.51	25.87	67	9.60	4.73	14.62	4.052	1	0	1	2	0	0	1	3	1	0	0	0
1	0	312	1.04	2.47	24.34	63	4.75	4.73	14.62	4.052	1	0	1	2	0	0	1	3	1	0	0	0
0	1	313	3.21	3.52	24.34	78	6.10	4.16	16.02	0.489	0	0	1	0	0	0	0	1	0	0	1	1
0	1	312	3.18	3.53	23.12	84	4.97	4.84	10.38	3.512	0	0	0	0	0	0	1	1	1	0	0	0
1	0	311	1.45	4.98	24.67	97	5.32	4.76	12.38	1.800	1	0	0	3	0	0	0	2	1	1	0	1
0	1	312	2.22	3.52	24.34	93	6.10	4.84	10.38	3.512	0	0	0	0	0	0	1	1	1	0	0	0
1	0	310	1.45	4.99	23.19	72	5.48	4.80	12.67	2.203	0	0	1	10	0	1	0	1	1	0	0	0
1	0	310	1.47	2.98	23.19	56	5.48	5.10	12.96	1.84	1	1	0	1	0	0	0	2	1	1	0	0
1	0	309	1.23	3.81	23.78	93	4.91	5.10	12.96	1.84	1	1	0	1	0	0	0	2	1	1	0	0
1	0	308	1.19	3.77	23.86	92	4.55	4.54	12.15	1.757	1	0	1	11	0	0	0	1	1	0	0	0
1	0	306	1.20	3.80	23.86	55	4.55	4.17	14.16	0.869	1	1	1	2	0	0	0	0	0	1	1	1
1	0	307	2.9	3.61	23.56	50	12.10	4.17	14.16	0.869	1	1	1	2	0	0	0	0	0	1	1	1
1	0	305	2.93	3.63	23.56	85	5.07	4.52	14.25	1.241	0	0	0	9	1	0	0	0	1	1	0	1
0	1	305	2.19	1.75	24.12	76	5.39	4.55	13.38	2.366	1	0	0	0	1	0	0	1	0	1	0	1
1	0	305	2.02	1.73	24.45	70	4.79	3.64	12.75	0.638	1	1	0	1	0	0	1	0	0	1	0	1
0	1	305	0.73	2.39	24.12	99	4.11	4.84	12.91	4.364	1	0	0	0	0	0	1	3	1	1	0	1
1	0	305	2.91	3.61	23.56	60	5.07	3.64	12.75	0.638	1	1	0	1	0	0	1	0	0	1	0	1
1	0	304	0.73	2.36	23.45	97	4.20	5.09	14.23	3.706	0	0	1	8	1	1	1	1	1	1	1	1
1	0	303	3.32	3.12	25.12	66	4.65	3.71	11.15	4.319	1	0	1	6	1	1	0	0	1	1	0	1
0	1	303	3.34	3.13	24.19	94	4.75	4.20	10.97	1.616	1	0	0	0	0	0	1	2	1	1	0	1
0	1	297	3.31	3.07	24.19	91	5.34	4.36	15.95	0.652	1	1	0	0	0	0	1	1	0	1	0	0
0	1	302	0.83	2.37	24.78	80	5.34	4.36	15.95	0.652	1	1	0	0	0	0	1	1	0	1	0	0
0	1	301	0.85	2.35	24.67	90	4.97	3.58	12.26	1.205	1	0	0	0	0	0	0	1	0	1	0	0
1	0	300	5.63	2.91	24.44	60	4.80	4.77	11.63	1.718	1	0	1	4	1	0	0	1	1	1	0	1
1	0	298	5.61	2.94	24.12	66	5.29	4.18	13.06	1.489	1	0	0	2	0	0	0	1	0	1	0	0
0	1	300	1.68	2.02	24.24	85	4.59	4.65	10.47	6.060	1	0	0	0	1	0	1	1	1	0	0	1
0	1	300	1.71	2.04	24.24	55	5.24	4.73	13.86	1.423	1	1	0	0	0	0	0	3	1	1	0	0
0	1	299	1.69	2.08	24.35	78	5.24	4.73	13.86	1.423	1	1	0	0	0	0	0	0	1	1	0	0
0	1	299	1.38	2.48	24.22	70	5.18	4.50	11.66	0.852	1	0	0	0	0	0	0	1	1	1	0	0
1	0	297	1.29	2.45	24.11	64	4.57	3.97	12.63	6.242	1	0	1	1	0	0	0	0	1	1	0	1
1	0	296	1.78	1.82	24.33	87	5.12	4.20	13.65	0.763	1	0	0	1	1	0	1	1	0	0	0	1
0	1	287	1.77	1.83	24.66	73	5.26	4.78	11.89	1.850	1	1	0	0	0	0	1	2	1	1	0	1
0	1	296	1.19	2.17	23.56	98	5.21	4.15	13.89	1.043	1	1	0	0	0	0	1	2	1	1	0	1
0	1	296	1.78	1.82	24.66	61	5.21	4.15	13.89	1.043	1	1	0	0	0	0	1	2	1	1	0	1
0	1	295	1.21	2.13	23.11	82	4.92	4.70	12.09	4.064	0	0	0	0	0	0	0	1	1	1	0	0
0	1	294	1.48	3.14	23.22	100	4.75	3.51	11.16	1.435	0	0	0	0	0	0	0	1	1	1	0	0
1	1	294	1.49	3.17	23.33	93	5.12	4.15	13.27	0.586	0	0	0	1	0	0	1	0	1	0	0	0
1	1	294	1.46	3.12	23.33	85	5.57	4.71	12.78	1.57	1	0	0	11	1	0	0	1	1	1	0	1
1	0	293	1.18	2.51	23.33	91	5.57	4.71	12.78	1.57	1	0	0	11	1	0	0	1	1	1	0	1
0	1	293	1.19	2.52	23.44	82	4.73	4.78	15.04	1.361	1	0	0	0	1	0	0	1	0	1	0	0
0	1	292	0.64	2.35	23.66	89	6.73	3.80	10.37	3.383	1	0	0	0	0	0	1	1	0	0	0	1
0	1	292	0.67	2.39	23.66	53	5.12	4.43	11.66	1.634	1	0	0	0	1	0	0	0	1	1	0	0
1	1	290	0.62	2.28	23.55	67	6.58	5.76	16.01	0.002	1	0	1	1	1	0	0	3	1	1	0	0
1	0	290	1.70	2.74	23.77	92	4.61	4.58	12.13	2.181	1	0	0	9	1	0	1	2	1	1	0	1
1	0	289	1.67	2.73	23.99	98	4.66	3.67	11.17	1.603	1	0	0	1	0	0	1	2	1	1	0	0
1	0	288	0.61	2.22	23.12	69	4.66	4.25	11.81	1.396	0	0	0	1	0	0	1	0	1	1	0	0
0	1	286	0.63	2.21	22.12	53	5.12	4.43	11.66	1.634	1	0	0	0	1	0	0	0	1	1	0	0
0	1	286	1.54	2.51	22.68	66	6.06	4.41	12.40	1.200	0	1	0	0	0	0	1	1	1	1	0	0
1	0	285	1.55	2.55	22.79	88	5.74	5.28	11.88	1.899	1	1	0	1	0	0	0	0	0	0	0	1
1	0	285	1.08	1.17	22.90	91	4.59	5.01	11.38	0.615	1	0	0	1	0	0	0	1	1	1	0	1
0	1	285	1.06	1.21	22.09	99	4.71	9.96	15.75	0.209	1	0	0	0	0	0	0	1	0	1	1	1
1	0	285	1.54	2.51	22.79	97	4.59	5.01	11.38	0.615	1	0	0	1	0	0	0	1	1	1	0	1
0	1	284	0.97	1.30	22.98	51	6.31	4.38	13.09	1.023	1	1	0	0	0	0	0	0	0	1	0	0
0	1	284	0.99	1.33	22.99	69	4.79	3.49	13.10	1.823	1	0	0	0	0	0	0	1	1	1	0	0
0	1	283	1.44	2.9	22.88	89	5.10	4.31	11.44	1.214	1	0	1	0	0	0	1	1	1	1	0	1
1	0	282	1.42	2.87	22.77	69	5.46	4.36	11.39	2.311	1	0	1	1	1	0	1	1	1	1	0	0
0	1	283	1.48	2.33	22.98	88	5.56	3.35	11.82	0.522	1	0	0	0	0	0	1	1	1	1	0	1
0	1	282	1.47	2.35	22.91	98	4.74	4.18	11.31	1.528	0	0	0	0	0	0	0	1	0	1	0	0
0	1	281	3.79	4.34	22.98	71	6.15	4.35	15.62	0.962	1	0	0	0	0	0	1	0	1	1	0	0
1	0	282	1.44	2.9	22.77	74	5.46	4.48	13.17	1.502	1	1	0	3	0	1	0	2	0	1	0	0
1	0	280	3.79	4.33	22.99	71	5.11	4.48	13.17	1.502	1	1	0	3	0	1	0	2	0	1	0	0
0	1	280	0.61	2.14	22.12	77	5.34	4.94	10.64	5.279	0	0	0	0	0	0	1	1	1	1	0	0
1	1	278	0.64	2.16	24.12	100	4.84	4.37	15.17	0.377	1	0	0	2	1	0	0	1	1	1	0	1
1	0	277	2.33	3.11	23.12	83	4.99	4.84	11.01	1.746	1	0	1	6	0	0	0	1	0	1	0	1
0	0	277	2.31	3.12	24.10	85	5.06	4.39	12.16	5.449	1	0	0	0	1	0	0	1	1	1	0	0
0	0	277	1.34	2.49	25.80	93	4.55	4.39	16.52	3.593	1	0	0	0	0	0	0	2	0	0	0	1
0	1	276	1.35	2.54	21.15	60	4.97	5.15	13.11	1.618	0	0	0	0	0	0	1	2	0	1	1	1
0	0	277	1.34	2.49	25.80	93	4.97	5.15	13.11	1.618	0	0	0	0	0	0	1	3	0	1	1	1
1	0	276	0.43	1.64	22.45	84	5.3	3.94	13.12	2.782	1	0	1	1	0	0	0	1	0	1	0	0
1	0	275	0.45	1.61	23.12	54	4.76	4.09	12.44	2.339	1	0	1	6	1	0	1	2	0	0	0	1
1	0	275	1.54	2.83	23.55	70	4.76	4.09	12.44	2.339	1	0	1	5	1	0	1	2	0	0	0	1
1	0	279	1.57	2.82	22.44	87	4.78	4.30	13.78	1.006	1	0	0	1	0	0	0	1	1	1	0	1
0	1	275	1.51	4.52	23.56	100	4.67	3.99	12.21	3.828	1	1	0	0	1	0	0	3	1	1	0	0
1	0	275	1.54	2.85	23.55	91	4.76	4.30	13.78	1.006	1	0	0	1	0	0	0	1	1	1	0	1
0	1	271	1.49	4.52	23.56	92	4.67	4.59	13.07	1.720	1	0	0	0	0	0	0	2	1	1	0	0
0	1	274	1.50	4.54	24.65	96	4.28	4.59	13.07	1.720	1	0	0	0	0	0	0	2	1	1	0	0
0	0	266	1.17	1.89	23.56	90	4.87	4.54	15.91	0.900	1	0	0	0	0	0	1	0	1	1	0	0
0	0	274	1.18	1.92	23.56	55	4.87	4.79	13.61	2.589	1	0	0	0	0	0	1	2	1	1	0	1
1	0	273	1.14	1.87	23.12	80	5.04	4.16	13.54	2.569	1	0	0	7	0	1	0	3	0	0	0	0
1	0	273	0.54	1.6	20.12	75	4.86	4.31	15.06	0.989	1	0	0	3	0	0	1	1	0	0	0	1
0	1	273	0.56	1.63	20.19	50	5.79	4.79	13.61	2.589	1	0	0	0	0	0	1	2	1	1	0	1
1	0	272	1.42	2.15	23.12	93	4.90	4.02	11.91	1.278	1	0	0	1	0	0	1	1	0	1	0	1
0	1	272	1.39	2.12	24.87	94	4.86	4.61	11.51	2.066	1	0	0	0	0	0	1	2	1	1	0	0
1	0	271	2.84	3.57	25.12	76	5.27	4.75	11.07	1.004	1	1	1	7	0	0	0	0	0	0	0	1
1	0	269	2.83	3.58	25.12	84	5.0	5.09	12.44	7.851	1	0	1	4	0	0	0	3	0	1	0	1
1	0	269	0.61	2.36	25.19	78	5.12	3.98	11.05	2.447	1	0	0	1	0	0	1	1	1	1	0	1
1	0	269	2.84	3.57	25.12	66	5.0	3.98	11.05	2.447	1	0	0	1	0	0	1	1	1	1	0	1
1	0	268	0.63	2.35	26.12	60	4.85	4.24	10.67	1.612	1	1	0	1	0	0	0	1	1	1	0	0
1	1	265	1.18	1.74	24.31	99	4.75	5.16	16.57	2.340	1	0	0	1	0	1	0	1	1	1	0	0
0	1	268	1.11	1.77	22.16	59	5.69	4.37	12.31	2.844	1	0	0	0	0	0	0	0	1	1	0	0
1	1	268	1.21	1.72	24.31	77	4.75	4.11	10.06	1.619	1	0	1	2	0	0	0	2	0	1	0	0
1	0	267	1.25	2.75	22.19	75	4.82	4.11	10.06	1.619	1	0	1	2	0	0	0	2	0	1	0	0
0	1	267	1.23	3.60	22.06	77	5.45	4.88	11.78	0.86	1	0	0	0	0	0	1	1	1	0	0	1
1	1	263	1.64	3	22.09	79	4.77	4.77	13.25	0.856	1	0	0	5	1	0	0	0	1	1	0	0
1	0	262	1.63	2.86	22.01	59	5.03	3.73	12.31	1.565	1	0	1	2	0	0	0	0	0	1	0	1
0	1	262	1.38	3.98	22.56	57	5.67	4.74	14.18	1.005	0	0	0	0	0	0	1	2	1	1	0	0
0	1	261	1.41	2.56	22.78	96	5.39	4.32	12.58	1.389	1	0	0	0	0	0	1	1	0	1	0	1
0	1	261	1.35	3.98	22.78	91	4.97	4.51	14.53	1.791	0	1	0	0	0	0	0	1	1	1	0	0
0	1	260	5.01	2.35	22.87	70	4.97	4.51	14.53	1.791	0	1	0	0	0	0	0	1	1	1	0	0
0	1	259	5.03	2.35	22.09	54	4.98	3.70	10.66	2.021	1	1	0	0	0	0	1	0	1	1	0	0
1	0	259	1.74	1.94	22.87	85	5.11	5.12	12.87	2.658	1	0	0	1	0	0	1	2	1	1	0	0
1	0	259	1.77	1.92	23.12	51	4.90	4.25	10.27	1.098	1	0	0	1	0	0	1	1	0	0	0	1
1	0	258	0.9	2.34	23.15	65	4.11	4.93	13.07	1.345	0	0	1	1	0	0	0	1	0	0	0	1
0	1	258	0.88	2.36	23.98	51	5.18	3.79	12.97	0.857	0	0	0	0	0	0	1	2	1	0	0	1
0	1	257	0.93	2.32	23.98	80	4.12	4.31	12.01	2.243	1	0	0	0	0	0	1	2	0	1	0	0
0	1	256	1.52	3.50	23.19	58	5.31	9.27	23.96	0.004	1	0	1	0	0	0	1	3	0	1	0	0
0	1	256	1.54	2.87	23.10	54	4.12	4.31	12.01	2.243	1	0	0	0	0	0	1	2	0	1	0	0
0	1	255	4.84	2.77	22.90	53	6.31	4.05	12.92	0.601	0	1	0	0	0	0	0	2	1	1	0	1
0	1	256	1.83	2.79	22.90	89	4.83	4.89	11.32	2.34	1	0	0	0	0	0	0	1	1	1	0	0
0	1	255	2.84	2.82	22.98	73	4.83	4.89	11.32	2.34	1	0	0	0	0	0	0	1	1	1	0	0
1	0	254	0.97	2.34	22.90	66	4.03	5.03	13.31	2.025	1	1	0	2	0	1	0	2	1	1	0	1
1	0	253	0.99	2.33	22.78	88	4.86	4.84	14.00	1.86	1	0	0	6	0	0	0	2	1	1	0	0
0	1	254	1.08	2.59	22.77	78	4.69	4.72	14.48	1.366	1	0	0	0	0	0	0	2	1	1	0	0
0	1	252	1.09	2.57	22.76	53	4.74	4.16	13.45	2.121	0	0	1	0	0	0	1	2	0	0	0	1
1	0	248	0.53	2.22	23.90	97	5.31	4.33	14.22	1.041	1	0	0	4	0	0	1	1	1	1	0	1
1	0	251	0.51	2.26	23.90	85	5.40	4.80	12.76	1.955	1	0	0	6	0	0	1	2	0	0	0	1
1	0	250	0.55	2.20	25.12	73	5.40	4.80	12.76	1.955	1	0	0	3	0	0	1	1	0	0	0	1
0	1	249	2.45	2.6	25.19	55	4.93	3.95	12.22	1.141	0	0	0	0	0	0	0	2	1	0	1	1
1	0	247	2.44	2.63	26.01	98	5.23	3.91	13.50	3.519	0	0	1	6	0	0	1	2	0	0	0	0
1	0	247	2.41	2.61	26.01	92	5.23	4.65	13.97	2.035	1	0	0	1	0	0	0	1	1	1	0	1
0	1	245	0.97	2.95	26.02	74	9.39	4.71	11.27	1.219	1	0	0	0	0	0	1	0	1	0	0	0
1	0	244	0.95	2.99	25.98	69	5.49	4.65	13.97	2.035	1	0	0	1	0	0	0	1	1	1	0	1
0	1	243	3.43	4.1	25.12	87	5.84	3.43	11.63	0.966	1	0	0	0	0	0	1	2	1	0	0	0
0	1	240	3.38	3.18	25.19	81	5.22	3.83	13.48	0.957	1	0	0	0	0	0	1	1	1	1	0	0
0	1	240	0.93	1.42	24.67	80	5.3	4.44	12.09	1.812	1	0	0	0	0	0	1	3	1	0	0	0
0	1	240	0.94	1.41	24.56	99	4.51	4.39	14.02	1.426	1	0	0	0	1	0	1	1	1	1	0	0
0	1	240	1.34	2.51	24.12	67	4.31	3.96	13.17	0.907	1	0	0	0	0	0	0	1	1	1	0	0
0	1	236	0.95	1.47	24.67	72	5.3	4.44	14.02	1.426	1	0	0	0	1	0	1	1	1	1	0	0
0	1	239	1.34	2.52	24.13	52	5.20	4.71	13.55	2.171	1	1	0	0	0	0	1	1	0	1	0	1
0	0	239	1.93	2.90	24.14	64	5.70	4.32	15.25	1.955	0	0	0	0	0	0	1	1	1	1	0	0
1	1	239	1.34	2.51	24.13	98	5.20	4.32	15.25	1.955	0	0	0	1	0	0	1	1	1	1	0	0
1	0	238	1.95	2.89	24.18	78	5.22	4.23	12.07	1.872	1	0	1	1	0	0	1	1	0	0	1	1
0	1	238	1.69	3.71	24.87	98	4.86	4.15	11.86	2.309	1	0	0	0	0	0	1	2	1	0	0	1
1	0	237	1.67	2.98	23.98	76	4.37	5.72	19.03	0.002	1	0	1	12	1	0	1	0	1	1	0	1
0	1	235	1.06	2.12	23.99	75	4.51	4.51	11.59	2.256	1	0	0	0	1	0	1	1	1	1	0	1
0	1	234	1.04	2.13	23.96	59	4.7	4.42	10.13	1.047	1	0	0	0	0	0	0	1	1	1	0	0
0	1	233	1.46	3.46	23.67	56	5.64	3.63	13.28	2.466	1	1	0	0	1	0	0	0	0	0	0	1
1	0	233	1.44	3.51	23.55	76	4.41	4.83	13.02	2.447	1	0	0	6	1	0	0	0	1	0	0	0
0	0	232	0.42	1.78	23.44	58	6.99	4.26	12.56	0.792	0	1	0	0	1	0	1	2	1	1	0	1
0	1	233	1.46	3.46	23.67	80	5.64	4.26	12.56	0.792	0	1	0	0	1	0	1	2	1	1	0	1
1	0	231	0.44	1.77	23.12	62	4.91	5.02	13.34	5.050	1	0	0	1	1	0	1	2	1	1	0	1
0	1	230	2.77	2.76	23.43	95	4.86	3.80	13.05	2.278	1	1	0	0	1	0	0	1	0	1	0	1
1	0	229	1.77	3.73	23.12	73	4.95	2.68	11.41	0.72	1	0	0	1	0	0	0	1	1	1	0	1
0	0	227	2.74	3.75	23.12	82	4.95	3.68	14.19	2.382	0	0	0	0	0	0	1	2	1	0	0	1
1	0	228	0.43	2.83	22.98	71	4.76	3.68	14.19	2.382	0	0	0	1	0	0	1	2	1	0	0	1
0	1	226	0.44	2.81	22.98	86	4.86	4.14	12.48	2.408	1	0	0	0	0	0	0	2	0	1	0	1
1	1	325	1.37	1.76	22.76	99	5.16	5.24	13.57	2.863	1	0	0	7	0	0	0	1	1	1	0	1
0	1	225	1.39	1.77	22.98	56	5.62	3.50	14.07	1.648	1	1	0	0	0	0	0	1	1	1	0	0
0	1	224	1.34	1.72	22.76	98	5.16	3.50	14.07	1.648	1	1	0	0	0	0	0	1	1	1	0	0
1	1	225	1.36	1.74	22.76	98	5.16	3.50	14.07	1.648	1	1	0	3	0	0	0	1	1	1	0	0
0	1	223	2.03	2.95	23.12	74	5.18	4.58	12.51	1.587	0	0	0	0	0	0	0	1	1	0	0	0
1	1	223	2.04	2.93	23.12	81	5.18	4.73	12.02	3.660	1	1	1	2	0	0	0	1	1	0	0	1
0	1	222	2.00	2.96	23.18	66	5.09	4.73	12.02	3.660	1	1	1	0	0	0	0	1	1	0	0	1
0	0	222	0.69	1.96	23.08	80	5.91	4.41	12.67	2.745	1	0	0	0	0	0	0	1	1	0	0	1
0	1	222	0.71	1.99	23.06	62	6.47	4.12	12.01	0.897	0	1	0	0	0	0	0	2	1	1	0	0
1	0	222	1.95	2.94	23.07	60	5.18	3.77	10.37	1.032	1	0	0	2	1	0	1	0	1	1	0	0
0	1	222	2.03	2.95	23.18	91	5.09	4.58	12.51	1.587	0	0	0	0	0	0	0	1	1	0	0	0
0	1	221	0.69	1.96	23.06	93	6.47	4.03	13.98	1.77	1	0	0	0	1	0	0	3	0	1	0	0
1	0	220	1.99	2.94	22.76	66	4.87	4.62	11.30	0.979	1	0	1	10	0	0	0	2	1	1	0	1
0	1	214	0.95	1.33	22.48	70	5.67	4.03	13.98	1.77	1	0	0	0	1	0	0	1	0	1	0	0
0	1	220	0.93	1.29	23.56	78	5.10	4.68	14.52	2.185	1	0	0	0	0	0	0	1	1	1	0	0
0	1	220	2.46	2.14	23.19	64	4.30	3.87	12.95	1.921	1	0	0	0	0	0	0	1	1	0	0	1
0	1	219	0.95	1.33	23.56	63	5.10	3.87	12.95	1.921	1	0	0	0	0	0	0	1	1	0	0	1
0	1	218	0.98	2.80	25.12	76	4.81	4.42	15.36	0.837	0	1	0	0	0	0	1	1	0	1	0	0
1	0	217	1.10	2.47	25.98	79	4.27	4.26	13.20	1.759	1	0	0	6	0	0	1	1	1	1	0	1
0	1	216	0.42	2.04	23.12	99	4.87	4.54	15.00	0.358	1	1	0	0	1	0	0	0	1	1	0	0
1	0	215	1.08	2.46	25.98	50	4.27	4.43	13.71	1.334	1	0	0	8	0	1	0	1	1	0	0	1
0	1	217	1.26	3.57	23.19	62	4.92	3.94	13.27	0.623	1	0	0	0	1	0	1	0	1	0	0	0
1	0	212	0.91	2.76	22.23	94	4.56	4.43	13.71	1.334	1	0	0	8	0	1	0	1	1	0	0	1
0	1	211	0.44	2.41	22.56	70	4.72	5.09	16.70	2.697	1	0	0	0	1	1	0	1	1	1	0	1
1	0	210	1.46	3.36	22.76	95	4.66	4.65	13.42	1.84	1	0	0	1	0	0	0	1	1	1	0	1
0	0	210	1.43	3.33	22.76	73	4.66	4.23	14.52	2.298	0	0	1	0	0	0	0	1	0	1	0	1
0	0	213	1.45	3.38	22.76	73	4.66	4.23	14.52	2.298	0	0	1	0	0	0	0	1	0	1	0	1
0	1	207	0.86	2.42	22.98	63	4.89	4.53	16.00	0.338	1	0	0	0	0	0	0	2	0	1	0	0
0	1	206	1.05	2.73	21.19	81	5.29	4.34	13.00	1.508	1	1	0	0	1	0	0	3	0	0	0	1
1	1	204	1.35	3.85	20.18	84	4.64	4.03	12.23	0.997	0	0	0	1	0	0	0	2	1	1	0	0
0	1	202	4.61	4.67	20.19	53	5.52	4.13	14.63	1.212	1	0	0	0	1	0	1	0	1	1	0	1
0	1	199	0.56	1.55	20.19	88	5.36	4.53	14.34	1.174	1	0	0	0	0	0	1	0	0	1	0	0
1	0	197	0.59	2.59	19.05	53	5.74	4.23	14.52	2.298	0	0	1	2	0	0	0	1	0	1	0	1
0	0	195	1.13	2.44	19.20	87	5.43	3.98	12.56	4.587	0	0	0	0	0	0	1	2	0	1	0	0
0	1	195	1.56	1.87	19.90	60	4.86	3.92	14.71	1.505	1	0	0	0	0	0	0	2	1	1	0	1
0	1	198	1.53	4.65	19.90	56	4.86	3.97	14.27	0.297	0	0	0	0	0	0	0	2	0	1	0	0
1	0	195	1.13	2.44	19.20	74	5.43	4.23	14.52	2.298	0	0	1	2	0	0	0	1	0	1	0	1
0	1	194	1.04	4.48	19.97	60	4.47	3.97	14.27	0.297	0	0	0	0	0	0	0	2	0	1	0	0
1	1	193	1.16	2.05	21.22	86	5.03	4.07	11.17	3.55	1	0	0	3	0	0	1	1	1	1	0	0
1	1	196	1.19	2.07	21.22	64	5.03	4.07	14.17	2.368	1	0	0	2	1	0	1	1	1	1	0	0
0	1	193	1.11	2.05	21.22	64	5.03	3.97	14.27	0.297	0	0	0	0	0	0	0	2	0	1	0	0
1	0	192	0.65	2.98	21.56	52	4.60	4.38	14.19	1.108	0	0	1	3	0	0	0	3	0	1	0	0
0	1	192	0.85	2.96	21.97	67	4.71	4.18	14.17	2.368	1	0	0	0	1	0	1	1	1	1	0	0
1	0	191	1.23	2.22	24.19	83	4.84	4.49	14.35	2.555	1	0	1	6	1	0	0	0	1	1	0	1
0	0	191	1.25	2.23	24.19	95	4.84	3.82	12.55	0.779	1	0	0	0	0	0	1	2	1	0	0	0
0	1	190	0.49	1.98	25.98	69	7.25	4.28	11.85	1.987	1	0	0	0	0	0	0	2	0	1	0	0
1	0	186	0.77	2.75	24.19	55	4.88	3.82	12.55	0.779	1	0	0	1	0	0	1	2	1	0	0	0
1	1	185	0.98	2.07	23.12	71	5.31	4.95	12.08	1.753	1	0	0	5	0	0	1	2	1	1	0	1
0	0	181	0.76	2.01	24.76	62	8.59	3.84	13.35	1.401	1	1	0	0	0	0	1	1	0	1	0	1
1	0	182	2.07	3.48	23.19	59	4.55	4.55	12.69	0.673	1	1	0	1	1	0	0	0	1	1	0	0
0	0	183	0.76	2.01	24.76	84	8.59	4.30	11.61	2.766	1	0	1	0	0	0	0	1	1	0	0	0
0	1	170	0.85	1.98	24.18	70	4.96	4.30	11.61	2.766	1	0	1	0	0	1	0	1	1	0	0	0
0	1	158	1.92	2.98	19.99	66	4.89	4.38	13.85	1.51	1	0	0	0	0	0	1	3	1	1	0	0
1	0	146	0.74	1.83	20.56	99	4.86	6.64	19.32	0.03	1	0	0	2	0	0	1	1	1	1	0	1
1	0	148	0.73	1.84	20.56	78	4.86	4.55	12.69	0.673	1	1	0	1	1	0	0	0	1	1	0	0
0	1	136	0.61	1.74	21.97	73	5.79	4.64	15.30	2.175	1	0	0	0	0	0	1	2	1	0	0	0
1	1	131	1.22	2.69	23.76	92	4.94	4.38	13.85	1.51	1	0	0	1	0	0	1	0	1	1	0	0
1	1	406	3.01	3.55	26.87	85	5.53	4.44	12.01	0.477	1	0	0	1	0	0	0	1	0	1	0	1
